# Supplementary material for: A spectroscopic study on the satellite vibronic band in phosphorescent Pt-complexes with high colour purity
Source: Royal Society of Chemistry journal article supplement (doi:10.1039/c7cp06069f), 2017-01-01
Supplement: c7cp06069f1.pdf [file c7cp06069f1.pdf]

Electronic Supporting Information

## Spectroscopic study on the satellite vibronic band in phosphorescent Pt-complexes with high colour purity

Mirang Son,<sup>a</sup> Yang-Jin Cho,<sup>a</sup> Ho-Jin Son,<sup>a\*</sup> Dae Won Cho<sup>ab\*</sup> and Sang Ook Kang<sup>a\*</sup>

<sup>a</sup> Department of Advanced Materials Chemistry, Korea University (Sejong), Sejong, 30019, South Korea.

<sup>b</sup> Center for Photovoltaic Materials, Korea University (Sejong), Sejong, 30019, South Korea.

### Figures

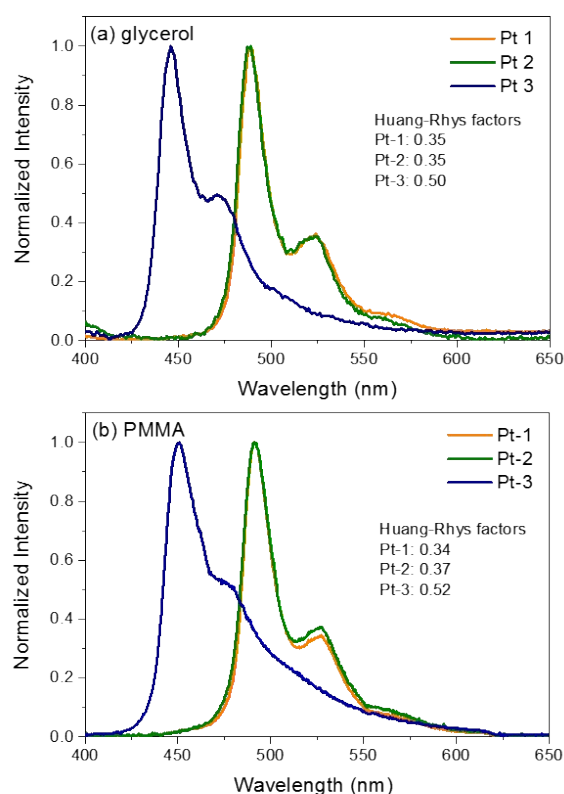

**Fig. S1.** The phosphorescence emission spectra of **Pt-1**, **Pt-2** and **Pt-3** measured in (a) glycerol, and (b) PMMA (poly(methyl methacrylate), MW: ~150,000) film at 300 K. Excitation wavelength is 355 nm. Huang-Rhys parameters are given in figures.

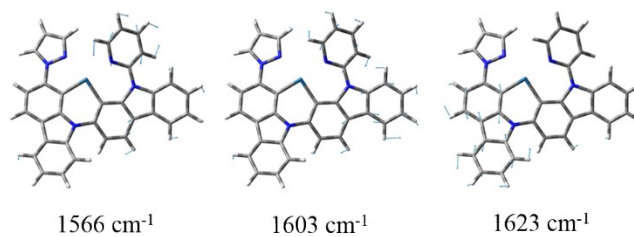

**Fig. S2.** Ring C=C stretching vibrational modes of **Pt-1**

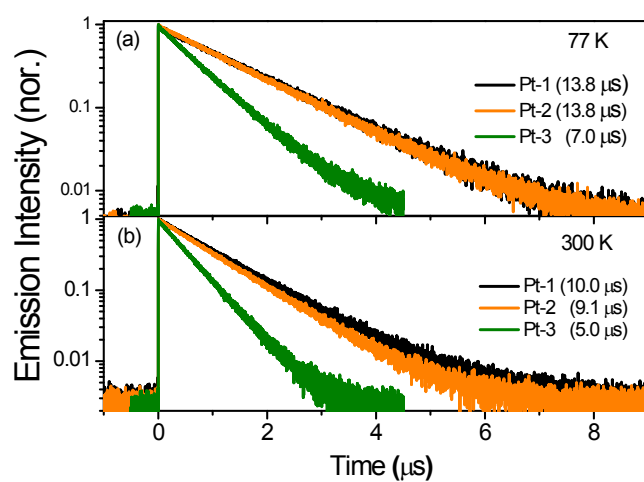

**Fig. S3.** Phosphorescence decay profiles of Pt-complexes measured at 300 and 77 K. Excitation wavelength are 355 nm.
